# Supplementary material
Source: Springer Nature journal article supplement (https://www.springermedizin.de/resource/supplementary/12985_2010_967_MOESM8_ESM.pdf/9608846)

$\lambda$ /HindIII

undigested

EcoRI

Sall

PstI

HindIII

BamHI

Sau3AI

Sse8387I

NotI

Swal

$\lambda$ /HindIII

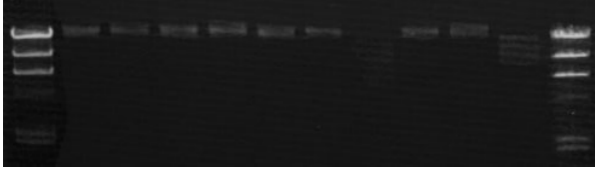

$\lambda$ /HindIII

undigested

BalI

BglII

DraI

EcoRV

HpaI

NcoI

NdeI

PvuII

SacI

Scal

SspI

XbaI

HaeIII

undigested

$\lambda$ /HindIII

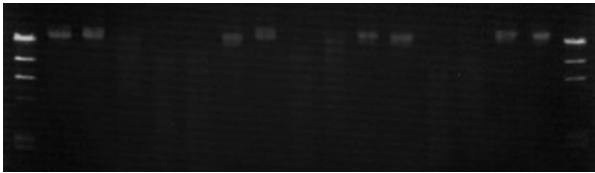

Supplement: MOESM8 [file 9608846]
